# Supplementary material for: Self-passivated ultra-thin SnS layersviamechanical exfoliation and post-oxidation
Source: Royal Society of Chemistry journal article supplement (doi:10.1039/c8nr06390g), 2018-01-01
Supplement: c8nr06390g1.pdf [file c8nr06390g1.pdf]

## Supplementary information

### Self-passivated ultra-thin SnS layers via mechanical exfoliation and post-oxidation

Naoki Higashitarumizu<sup>1</sup>, Hayami Kawamoto<sup>1</sup>, Masaru Nakamura<sup>2</sup>, Kiyoshi Shimamura<sup>2</sup>, Naoki Ohashi<sup>2</sup>, Keiji Ueno<sup>3</sup> and Kosuke Nagashio<sup>1\*</sup>

<sup>1</sup>Department of Materials Engineering, The University of Tokyo, Tokyo 113-8656, Japan

<sup>2</sup>National Institute for Materials Science (NIMS), Tsukuba, Ibaraki 305-0044, Japan

<sup>3</sup>Department of Chemistry, Saitama University, Saitama 338-8570, Japan

\*E-mail: nagashio@material.t.u-tokyo.ac.jp

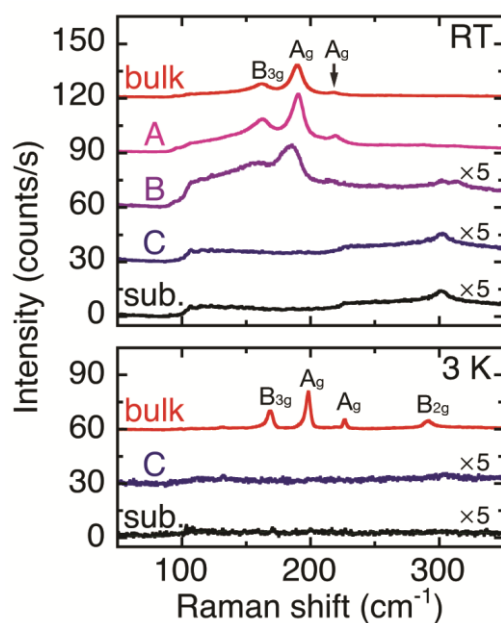

**Fig. S1** Raman spectra measured at the points A, B, and C in Fig. 1b. The Raman spectrum of the SiO<sub>2</sub>/Si substrate is also shown.

In the Raman spectra of the bulk flake (~432 nm thick) at RT, as shown in **Fig. S1**, specific peaks of SnS were observed at 161.7, 189.6 and 218.3  $\text{cm}^{-1}$ , which are consistent with the reported values.<sup>1-3</sup> With a reduction in the thickness from bulk to A to B, the sharp spectrum became broader with a redshift. The broadening and redshift are considered to be due to a phonon confinement owing to the thinning effect.<sup>4,5</sup> When the flake thickness further decreased to 4.3 nm (point C), Raman spectrum suddenly disappeared at RT and was not recovered even at 3 K. In contrast, a clear spectrum was observed for the bulk SnS with a smaller full-width at half-maximum and larger intensity at 3 K, compared with that at RT. These results indicate that the disappearance of Raman peaks below a critical thickness of 4.3 nm originates from the surface modification rather than the detection limit of Raman measurement.

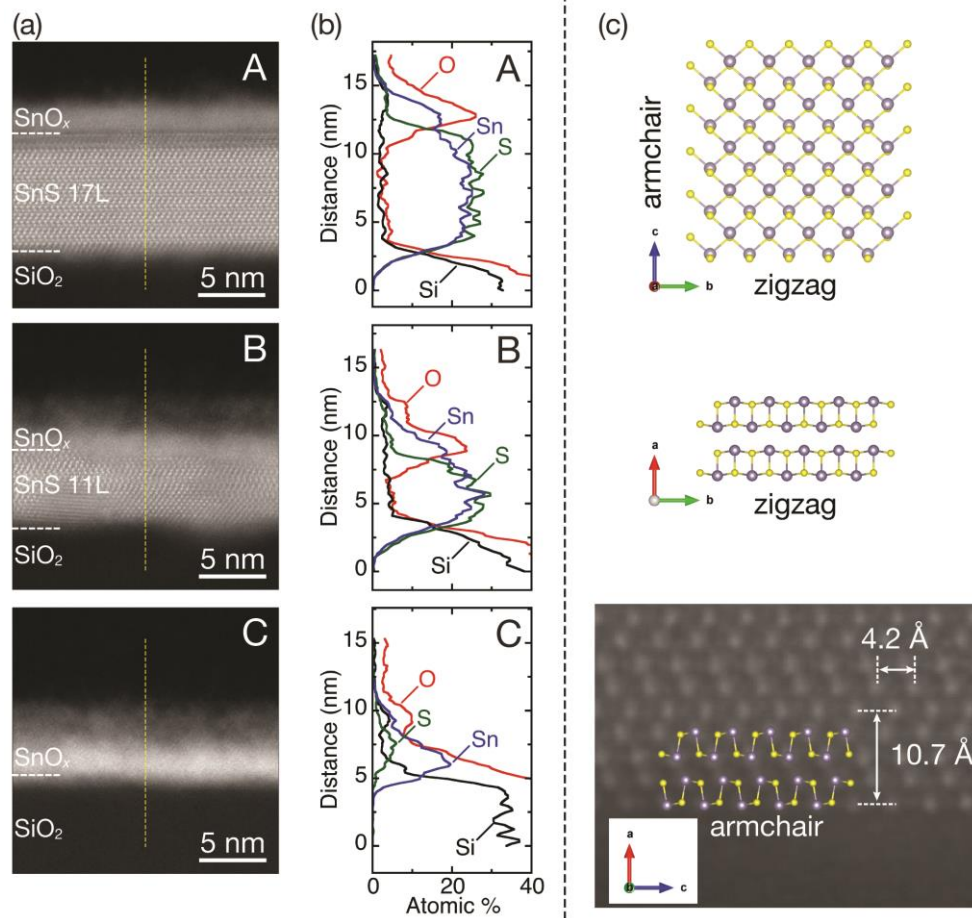

**Fig. S2** (a) Cross-sectional HAADF-STEM images of SnS flakes at the points A, B, and C in **Fig. 1b**. (b) EDS depth profiles of SnS flakes along the dashed lines in Fig. S2a. (c) Crystal structure of SnS from *a*, *b*, and *c* axis. Enlarged cross-sectional HAADF-STEM image at the point A is also shown in comparison with a crystal structure model along the armchair direction. Sn and S atoms are shown in grey and yellow, respectively.

The a-SnO<sub>x</sub>/SnS hetero-structure was also observed for the point B (10.5 nm), as well as point A (13.8 nm), whereas only the a-SnO<sub>x</sub> layer was observed for the point C (4.3 nm), lacking apparent crystallinity. Notably, the HAADF-STEM image of the point B is more ambiguous than that of the point A, because it was difficult to obtain a clear electron diffraction image with the decrease in the flake thickness owing to the in-plane fluctuation, which originates from the surface roughness of the SiO<sub>2</sub>/Si substrate. As shown in **Fig. S2c**, the atomic configurations of SnS layers correspond to those of 2D SnS grown via physical vapor deposition and bulk SnS along the armchair *c* axis direction,<sup>2,3,6-10</sup> where the largest carrier mobility can be obtained.<sup>11,12</sup> The lattice constants were determined to be *a* = 10.7 Å and *c* = 4.2 Å, consistent with the reported values.<sup>8-10</sup> The numbers of SnS layers at the points A and B were determined to be 17 and 11 (17L and 11L), respectively.

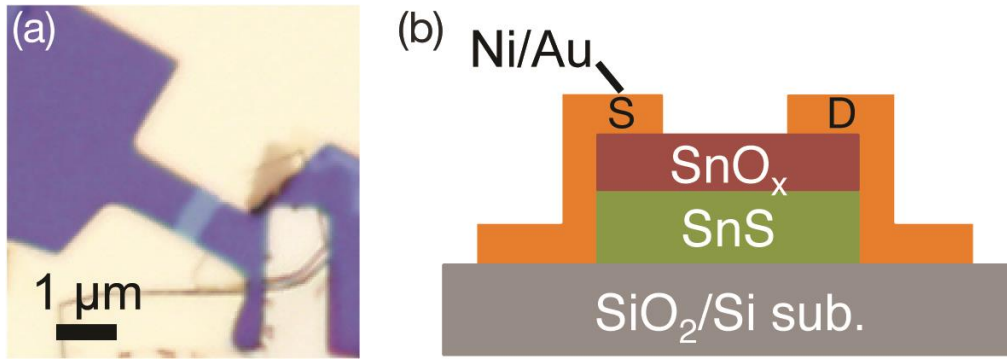

**Fig. S3** (a) Typical optical image and (b) cross-sectional illustration of back-gated SnO<sub>x</sub>/SnS FET.

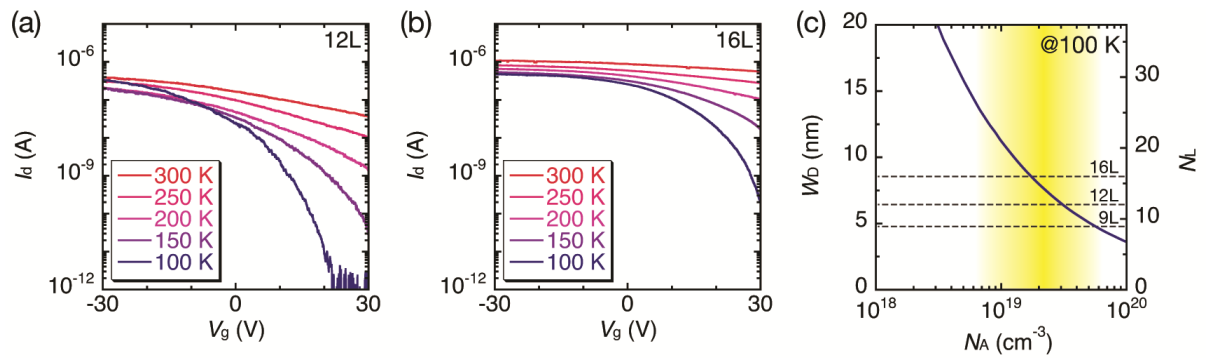

**Fig. S4**  $I_d$ - $V_g$  plots of (a) 12L and (b) 16L SnS FETs in the temperature range 300–100 K. (c) Relationship between depletion width  $W_D$  and acceptor density  $N_A$  at 100 K.  $N_L$  is the number of SnS layers, which corresponds to  $W_D$ . The highlighted region shows the estimated  $N_A$  of SnS.

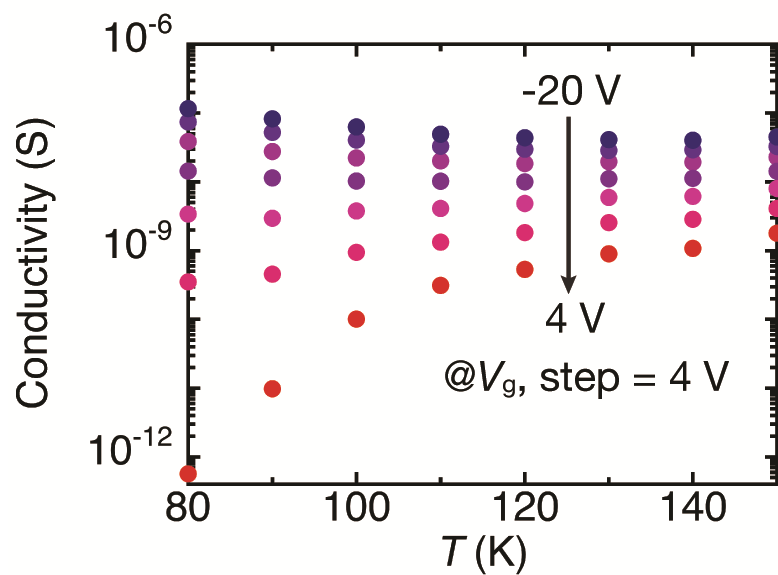

**Fig. S5** Two-probe conductivity as a function of temperature for the 9L SnS fabricated via Au-exfoliation.

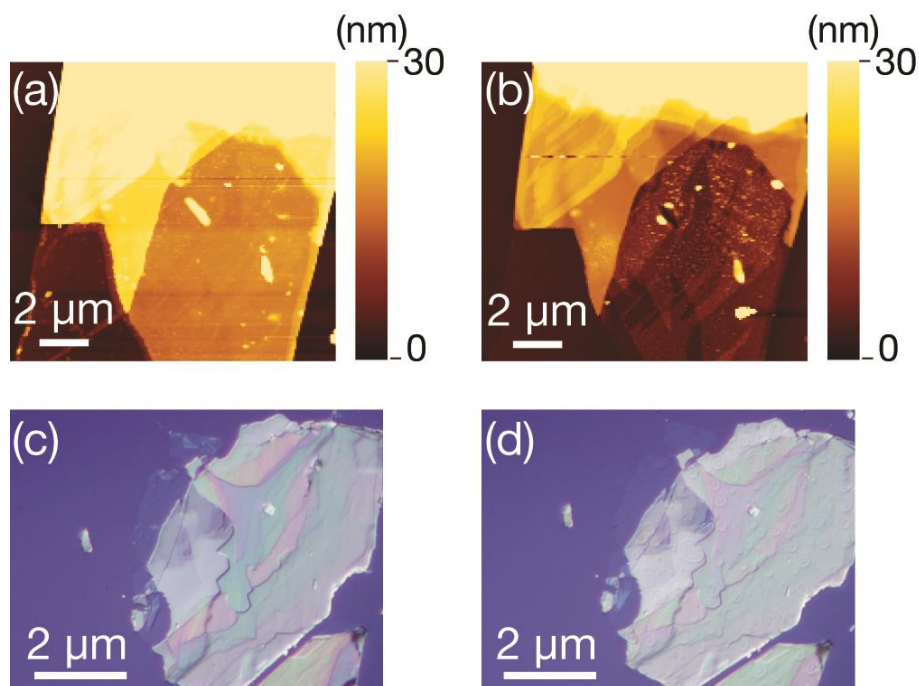

**Fig. S6** (a,b) AFM topographic images of SnS flakes (a) before and (b) after  $O_2$  plasma treatment at RT with the radio frequency power of 300 W for 450 sec. (c,d) Optical images with Normarski interference contrast of SnS flakes (c) before and (d) after ozone treatment at  $200^\circ\text{C}$  for 1 h.

**Table 1** Typical etching rates of SnS in the early stage of annealing (<20 min) at different temperatures.

| Temperature (°C)      | 350  | 380 | 410 | 430 |
|-----------------------|------|-----|-----|-----|
| Etching rate (nm/min) | <0.1 | 0.9 | 2.0 | >10 |

#### References

- 1 H. R. Chandrasekhar, R. G. Humphreys, U. Zwick and M. Cardona, *Phys. Rev. B*, 1977, **15**, 2177–2183.
- 2 J. Xia, X.-Z. Li, X. Huang, N. Mao, D.-D. Zhu, L. Wang, H. Xu and X.-M. Meng, *Nanoscale*, 2016, **8**, 2063–2070.
- 3 M. Li, Y. Wu, T. Li, Y. Chen, H. Ding, Y. Lin, N. Pan and X. Wang, *RSC Adv.*, 2017, **7**, 48759–48765.
- 4 Y. Kanemitsu, H. Uto, Y. Masumoto, T. Matsumoto, T. Futagi and H. Mimura, *Phys. Rev. B*, 1993, **48**, 2827–2830.
- 5 Y. Sun, Z. Sun, S. Gao, H. Cheng, Q. Liu, F. Lei, S. Wei and Y. Xie, *Adv. Energy Mater.*, 2014, **4**, 1300611.
- 6 S. Sucharitakul, U. Rajesh Kumar, R. Sankar, F.-C. Chou, Y.-T. Chen, C. Wang, C. He, R. He and X. P. A. Gao, *Nanoscale*, 2016, **8**, 19050–19057.
- 7 Z. Tian, C. Guo, M. Zhao, R. Li and J. Xue, *ACS Nano*, 2017, **11**, 2219–2226.
- 8 M. Nakamura, H. Nakamura, M. Imura, S. Otani, K. Shimamura and N. Ohashi, *J. Alloys Compd.*, 2014, **591**, 326–328.
- 9 D. R. Lide, *CRC Handbook of Chemistry and Physics, Internet Version*, CRC press, Boca Raton, 2005.
- 10 S. Del Bucchia, J. C. Jumas and M. Maurin, *Acta Crystallogr. Sect. B*, 1981, **37**, 1903–1905.
- 11 C. Xin, J. Zheng, Y. Su, S. Li, B. Zhang, Y. Feng and F. Pan, *J. Phys. Chem. C*, 2016, **120**, 22663–22669.
- 12 L.-C. Zhang, G. Qin, W.-Z. Fang, H.-J. Cui, Q.-R. Zheng, Q.-B. Yan and G. Su, *Sci. Rep.*, 2016, **6**, 19830.
